# Supplementary material for: FBP2—A New Player in Regulation of Motility of Mitochondria and Stability of Microtubules in Cardiomyocytes
Source: MDPI journal article supplement (doi:10.3390/cells11101710), 2022-05-21
Supplement: s1 [file s1]

## Supplementary Materials

**Table S1. Mass spectrometry identified tubulin chains and MAP1B as potential FBP2 interactors.**

| <b>Tubulin alpha-1C chain</b> <a href="#">Q3TIZ0 Q3TIZ0_MOUSE</a><br>Mass: 50592 Score: 257 Queries matched: 6 emPAI: 0.43<br>Putative uncharacterized protein OS=Mus musculus GN= <b>Tuba1c</b> PE=2 SV=1               |           |           |           |       |      |       |             |                                 |
|--------------------------------------------------------------------------------------------------------------------------------------------------------------------------------------------------------------------------|-----------|-----------|-----------|-------|------|-------|-------------|---------------------------------|
| Query                                                                                                                                                                                                                    | Observed  | Mr(expt)  | Mr(calc)  | ppm   | Miss | Score | Expect Rank | Peptide                         |
| <a href="#">899</a>                                                                                                                                                                                                      | 508.2930  | 1014.5714 | 1014.5709 | 0.44  | 0    | 61    | 0.00024     | 1 K.DVNAAIATIK.T                |
| <a href="#">929</a>                                                                                                                                                                                                      | 512.2275  | 1022.4405 | 1022.4417 | -1.14 | 0    | 47    | 0.002       | 1 K.EDAANNYAR.G                 |
| <a href="#">2755</a>                                                                                                                                                                                                     | 799.8901  | 1597.7656 | 1597.7599 | 3.54  | 0    | 70    | 2.7e-05     | 1 R.TIQFVDWCPTGFK.V             |
| <a href="#">2941</a>                                                                                                                                                                                                     | 851.4570  | 1700.8995 | 1700.8985 | 0.60  | 0    | 70    | 2.8e-05     | 1 R.AVFVDLEPTVIDEVR.T           |
| <a href="#">3175</a>                                                                                                                                                                                                     | 912.9942  | 1823.9739 | 1823.9782 | -2.36 | 0    | 57    | 0.00044     | 1 K.VGINYQPPTVVPGGDLAK.V        |
| <a href="#">3384</a>                                                                                                                                                                                                     | 1004.4486 | 2006.8826 | 2006.8858 | -1.57 | 0    | 108   | 1.7e-09     | 1 K.TIGGGDDSFNTFFSETGAGK.H      |
| <b>Microtubule-associated protein 1B</b> <a href="#">B2RQO5 B2RQO5_MOUSE</a><br>Mass: 271395 Score: 179 Queries matched: 3 emPAI: 0.03<br>Microtubule-associated protein 1B OS=Mus musculus GN= <b>Mtapa1b</b> PE=2 SV=1 |           |           |           |       |      |       |             |                                 |
| Query                                                                                                                                                                                                                    | Observed  | Mr(expt)  | Mr(calc)  | ppm   | Miss | Score | Expect Rank | Peptide                         |
| <a href="#">947</a>                                                                                                                                                                                                      | 514.8028  | 1027.5910 | 1027.5913 | -0.28 | 0    | 81    | 1.7e-06     | 1 R.AVLDALLEGK.A                |
| <a href="#">1638</a>                                                                                                                                                                                                     | 603.3339  | 1204.6533 | 1204.6526 | 0.62  | 0    | 55    | 0.00092     | 1 K.LEMYVLNPVK.S                |
| <a href="#">3276</a>                                                                                                                                                                                                     | 964.4337  | 1926.8529 | 1926.8595 | -3.46 | 0    | 107   | 2.3e-09     | 1 R.SSYYVVSNDPAAEPSR.A          |
| <b>Tubulin beta-2B chain</b> <a href="#">B2RSN3 B2RSN3_MOUSE</a><br>Mass: 50377 Score: 126 Queries matched: 2 emPAI: 0.13<br>MCG1395 OS=Mus musculus GN= <b>Tubb2b</b> PE=2 SV=1                                         |           |           |           |       |      |       |             |                                 |
| Query                                                                                                                                                                                                                    | Observed  | Mr(expt)  | Mr(calc)  | ppm   | Miss | Score | Expect Rank | Peptide                         |
| <a href="#">2788</a>                                                                                                                                                                                                     | 808.4231  | 1614.8316 | 1614.8287 | 1.82  | 0    | 74    | 1.3e-05     | 1 R.AILVDLEPGTMDSVR.S           |
| <a href="#">3978</a>                                                                                                                                                                                                     | 933.4530  | 2797.3371 | 2797.3361 | 0.33  | 0    | 88    | 2.9e-07     | 1 R.SGPFQIFRPDNFVFGQSGAGNNWAK.G |
| <b>Tubulin beta-4A chain</b> <a href="#">B4F7C2 B4F7C2_RAT</a><br>Mass: 50010 Score: 112 Queries matched: 2 emPAI: 0.13<br>RCG45085 OS=Rattus norvegicus GN= <b>Tubb4</b> PE=2 SV=1                                      |           |           |           |       |      |       |             |                                 |
| Query                                                                                                                                                                                                                    | Observed  | Mr(expt)  | Mr(calc)  | ppm   | Miss | Score | Expect Rank | Peptide                         |
| <a href="#">997</a>                                                                                                                                                                                                      | 520.3003  | 1038.5861 | 1038.5862 | -0.10 | 0    | 58    | 0.00027     | 1 R.YLTVAAVFR.G                 |
| <a href="#">3978</a>                                                                                                                                                                                                     | 933.4530  | 2797.3371 | 2797.3361 | 0.33  | 0    | 88    | 2.9e-07     | 1 R.SGPFQIFRPDNFVFGQSGAGNNWAK.G |
| <b>Tubulin beta-5 chain</b> <a href="#">Q80ZV2 Q80ZV2_MOUSE</a><br>Mass: 21554 Score: 69 Queries matched: 2 emPAI: 0.31<br>Tubb5 protein (Fragment) OS=Mus musculus GN= <b>Tubb5</b> PE=2 SV=1                           |           |           |           |       |      |       |             |                                 |
| Query                                                                                                                                                                                                                    | Observed  | Mr(expt)  | Mr(calc)  | ppm   | Miss | Score | Expect Rank | Peptide                         |
| <a href="#">997</a>                                                                                                                                                                                                      | 520.3003  | 1038.5861 | 1038.5862 | -0.10 | 0    | 58    | 0.00027     | 1 R.YLTVAAVFR.G                 |
| <a href="#">2861</a>                                                                                                                                                                                                     | 830.4525  | 1658.8905 | 1658.8879 | 1.54  | 0    | 43    | 0.012       | 1 R.ALTVPPELTQQVFDK.N           |

### Figure S1. Analysis of shape of the mitochondria

The shape of mitochondria was analyzed using the MiNA (Mitochondrial Network Analysis by Sturat Lab) plugin of the ImageJ/FIJI.

The form factor, defined as  $F = \text{perimeter}^2 / 4\pi \times \text{area}$ , is an indicator of the shape of an object. For a perfect circle  $F=1$  and it increases above 1 as the shape of the object becomes more elongated and complex (e.g., more branched). In untreated HL-1 cells (control) as well as in HL-1 cells with partially silenced expression of FBP2 (FBP2-) mitochondrial F values are higher than in HL-1 cells treated with the FBP2-tetramerizing agent (iFBP2), suggesting the FBP2-tetramerization-induced transition from elongated and complex to more simple and round morphology. \*\*\*  $p < 0.001$ .

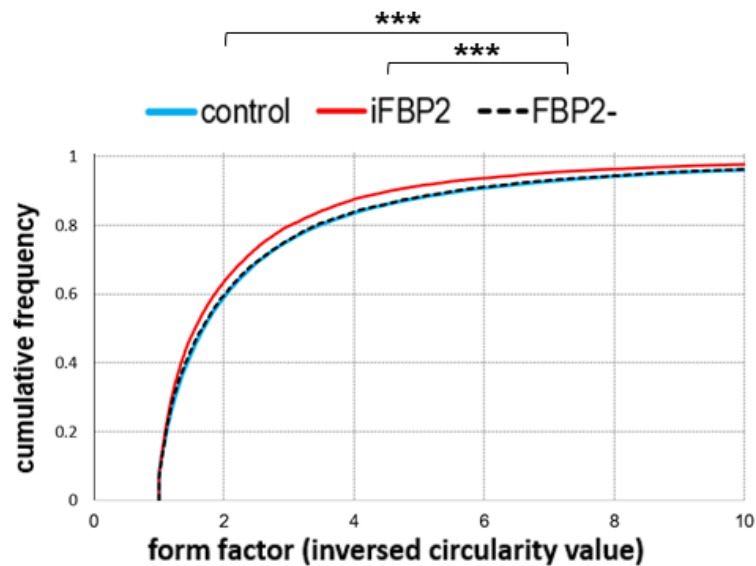

**Figure S2. Forced tetramerization of FBP2 does not change sarcomeric organization of actin in HL-1 cells**

A) untreated HL-1 cells; B) the FBP2-tetramerizing agent-treated HL-1 cells. Bar = 10  $\mu\text{m}$ .

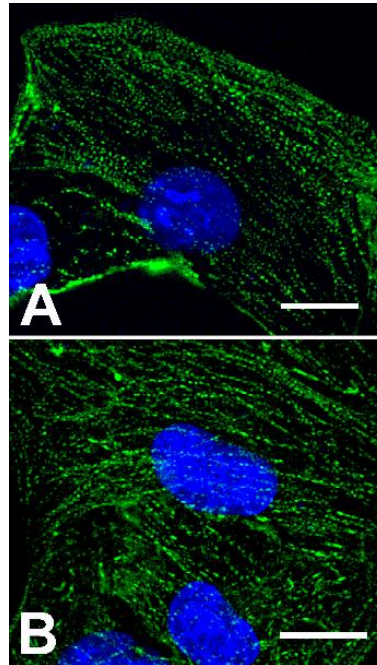

**Figure S3. Addition of 5.5 mM glucose to the culture medium does not change the effects of FBP2 tetramerization on mitochondrial motility**

Velocity (given in  $\mu\text{m/s}$ ) of at least 284 mitochondria was measured in each condition. \*\*\*  $p = 0$ .

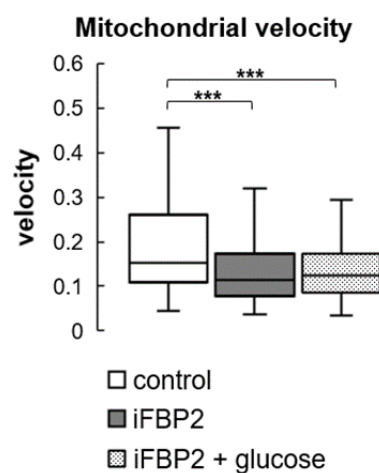

**Figure S4. Tetramerization of FBP2 results in a significant shortening of microtubule length in HL-1 cardiomyocytes.**

Quantification of the microtubule (MT) length was performed using ImageJ and the modified open source workflow created by Perrine Paul-Gilloteaux and available on the website: Bioimage Informatics Index, <https://biii.eu/microtubule-length-analysis>.

In each condition, measurements were taken from at least 33 cells from 12 randomly selected areas. \*\*\*  $p < 0.001$ .

Although in the original microscopic image, MTs appear to stretch almost the length of the untreated cell and thus, their length should reach at least dozen micrometers, subsequent steps of the workflow (“tubeness”, “skeletonization”) reveal that MTs create an intertwined network, the sections of which are measured by the program separately. Thus, this workflow probably lowers the MT size under the control conditions, but still shows the clear differences between MTs in cells with the “native” (a mixture of dimeric and tetrameric forms) FBP2 and chemically tetramerized FBP2.

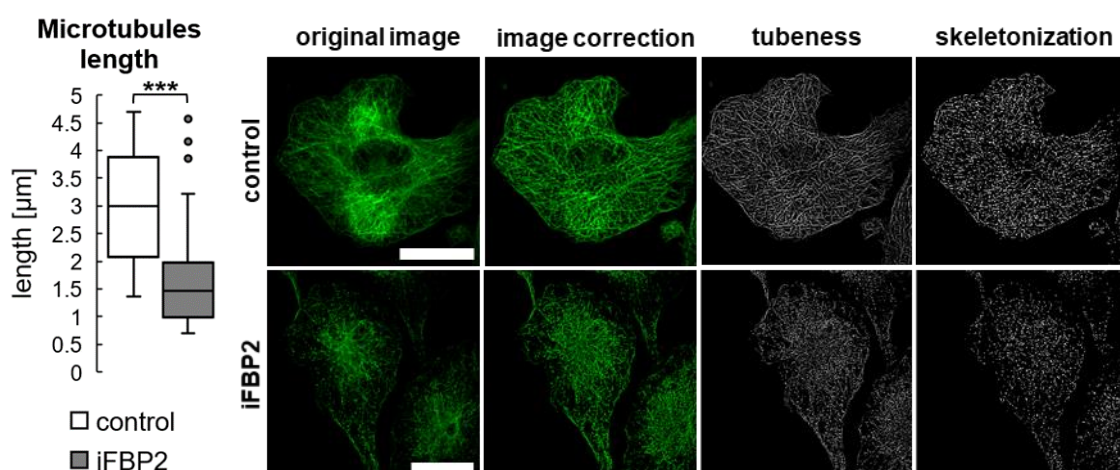

**Table S2. Soluble (non-transmembrane) proteins identified with the highest score by mass spectrometry in extracellular vesicles secreted by cardiac fibroblasts into the culture medium**

| <b>Soluble proteins</b>                  | <b>Entry number</b> | <b>Score</b> |
|------------------------------------------|---------------------|--------------|
| Heat shock cognate 71 kda protein        | P63017              | 1099         |
| Pyruvate kinase PKM                      | P52480              | 769          |
| Heat shock 70kda protein 1B              | P17879              | 614          |
| Heat shock protein hsp 90-beta           | P11499              | 598          |
| Heat shock 70kda protein 1-like          | P16627              | 556          |
| Heat shock protein hsp 90-alpha          | P07901              | 506          |
| Glyceraldehyde-3-phosphate dehydrogenase | P16858              | 491          |
| Fructose-bisphosphate aldolase A         | P05064              | 437          |
| Protein disulphide-isomerase             | P09103              | 437          |
| <b>14-3-3 protein zeta/delta</b>         | <b>P63101</b>       | <b>333</b>   |
| Elongation factor 1-alpha 1              | P10126              | 312          |
| L-lactate dehydrogenase b chain          | P16215              | 307          |
| Peptidyl-propyl cis-trans isomerase A    | P17742              | 285          |
| Atp-citrate synthase                     | Q91V92              | 281          |
| Phosphoglycerate kinase 1                | P09411              | 270          |
| Udp-glucose 6-dehydrogenase              | O70475              | 268          |
| Peptidyl-prolyl cis-trans isomerase B    | P24369              | 266          |
| Triosephosphate isomerase                | P17751              | 256          |
| Alpha-enolase                            | P17182              | 241          |
| Protein disulphide-isomerase A4          | P08003              | 234          |
| L-lactate dehydrogenase a chain          | P06151              | 231          |
| Aldehyde disulphide-isomerase A4         | O35945              | 230          |
| Glucose-6-phosphate 1-dehydrogenase X    | Q00612              | 230          |
| Protein disulphide-isomerase A6          | Q922R8              | 228          |
| Nucleoside diphosphate kinase B          | Q01768              | 210          |
| Elongation factor 2                      | P58252              | 197          |
| Protein disulphide-isomerase A3          | P27773              | 197          |
| Retinal dehydrogenase 1                  | P24549              | 191          |
| <b>14-3-3 epsilon protein</b>            | <b>P62259</b>       | <b>163</b>   |
| <b>14-3-3 gamma protein</b>              | <b>P61982</b>       | <b>162</b>   |
| Neuropilin-1                             | P97333              | 155          |
| <b>14-3-3 theta protein</b>              | <b>P68254</b>       | <b>151</b>   |
| Plastin-3                                | Q99K51              | 145          |
| Malate dehydrogenase cytoplasmic         | P14152              | 139          |
| 6-phosphogluconate dehydrogenase         | Q9DCD0              | 133          |
| 40s ribosomal protein S2                 | P25444              | 129          |
| <b>14-3-3 beta/alpha protein</b>         | <b>Q9CQV8</b>       | <b>127</b>   |
| Serine/arginine-rich splicing factor 1   | Q6PDM2              | 104          |
